# Supplementary material for: mRNA-1273 boost after BNT162b2 vaccination generates comparable SARS-CoV-2-specific functional responses in naïve and COVID-19-recovered individuals
Source: PubMed Central journal article supplement (PMC10160618; doi:10.3389/fimmu.2023.1136029), 2023-04-21
Supplement: DataSheet_1.pdf [file DataSheet_1.pdf]

*Supplementary Material*

Supplementary Figures

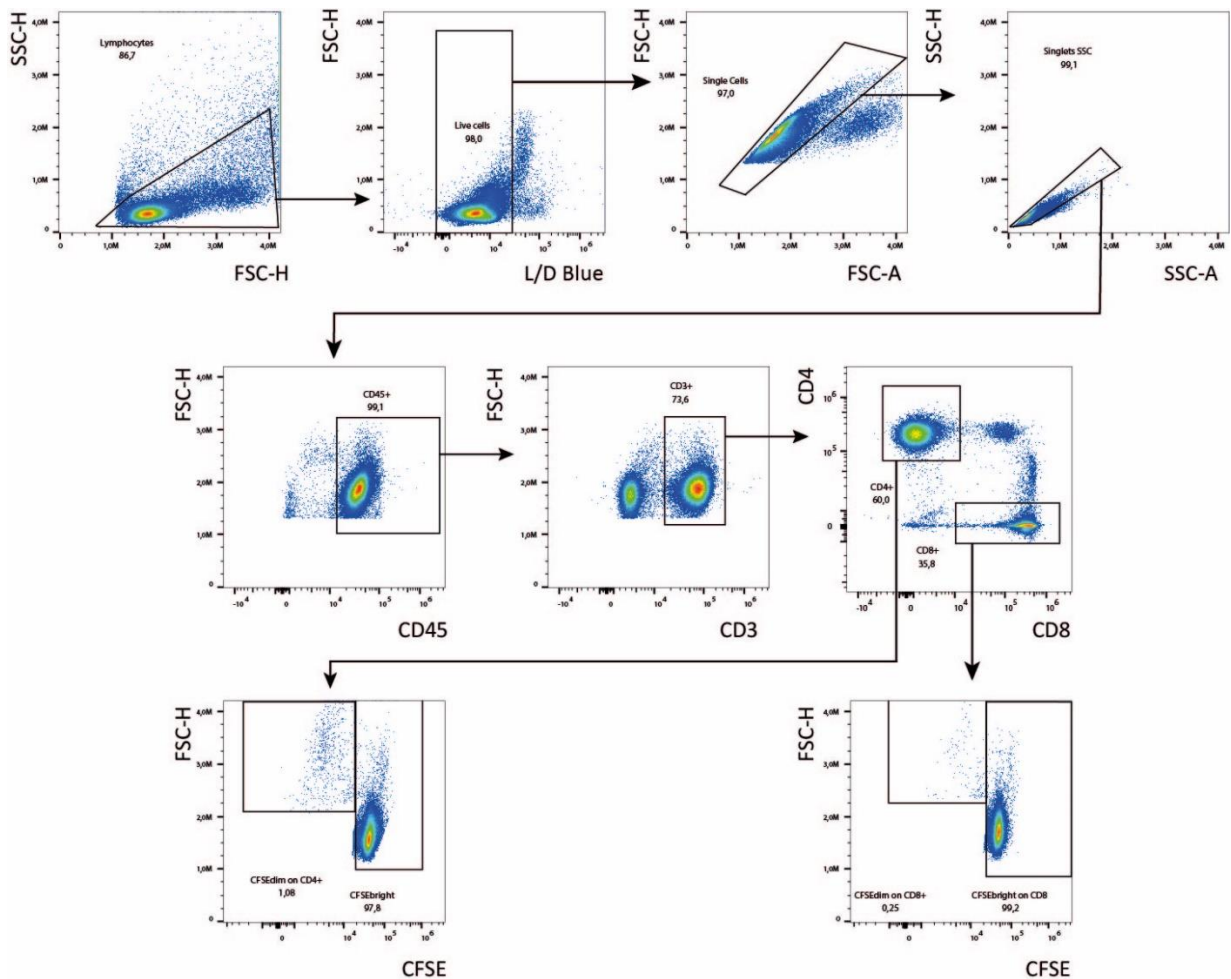

Supplementary Figure 1. FACS template used to analyze SARS-CoV-2 Spike-specific T cell responses.

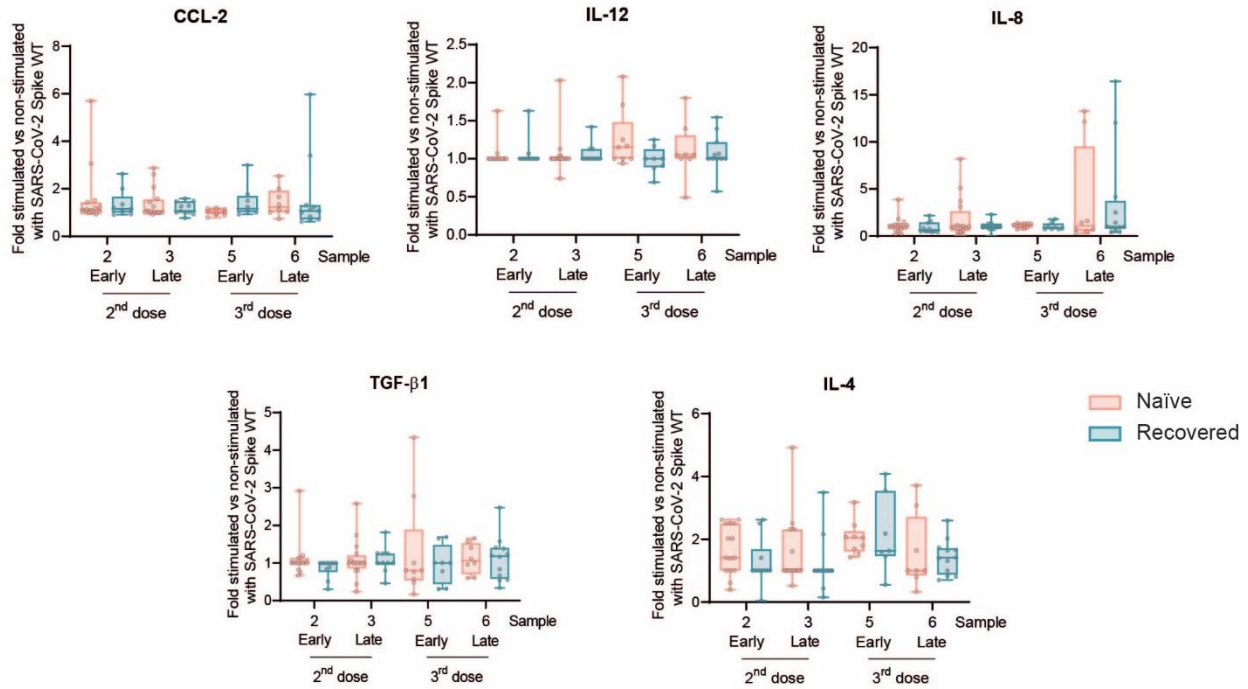

**Supplementary Figure 2. SARS-CoV-2 Spike-specific T cell-mediated *ex vivo* responses following prime-boost vaccination in naïve and individuals recovered from COVID-19.** CCL-2, IL-12, IL-8, TGF-β1 and IL-4 production in naïve participants and recovered from COVID-19 at the indicated sample numbers. Cytokines not induced in sample 2 are shown.

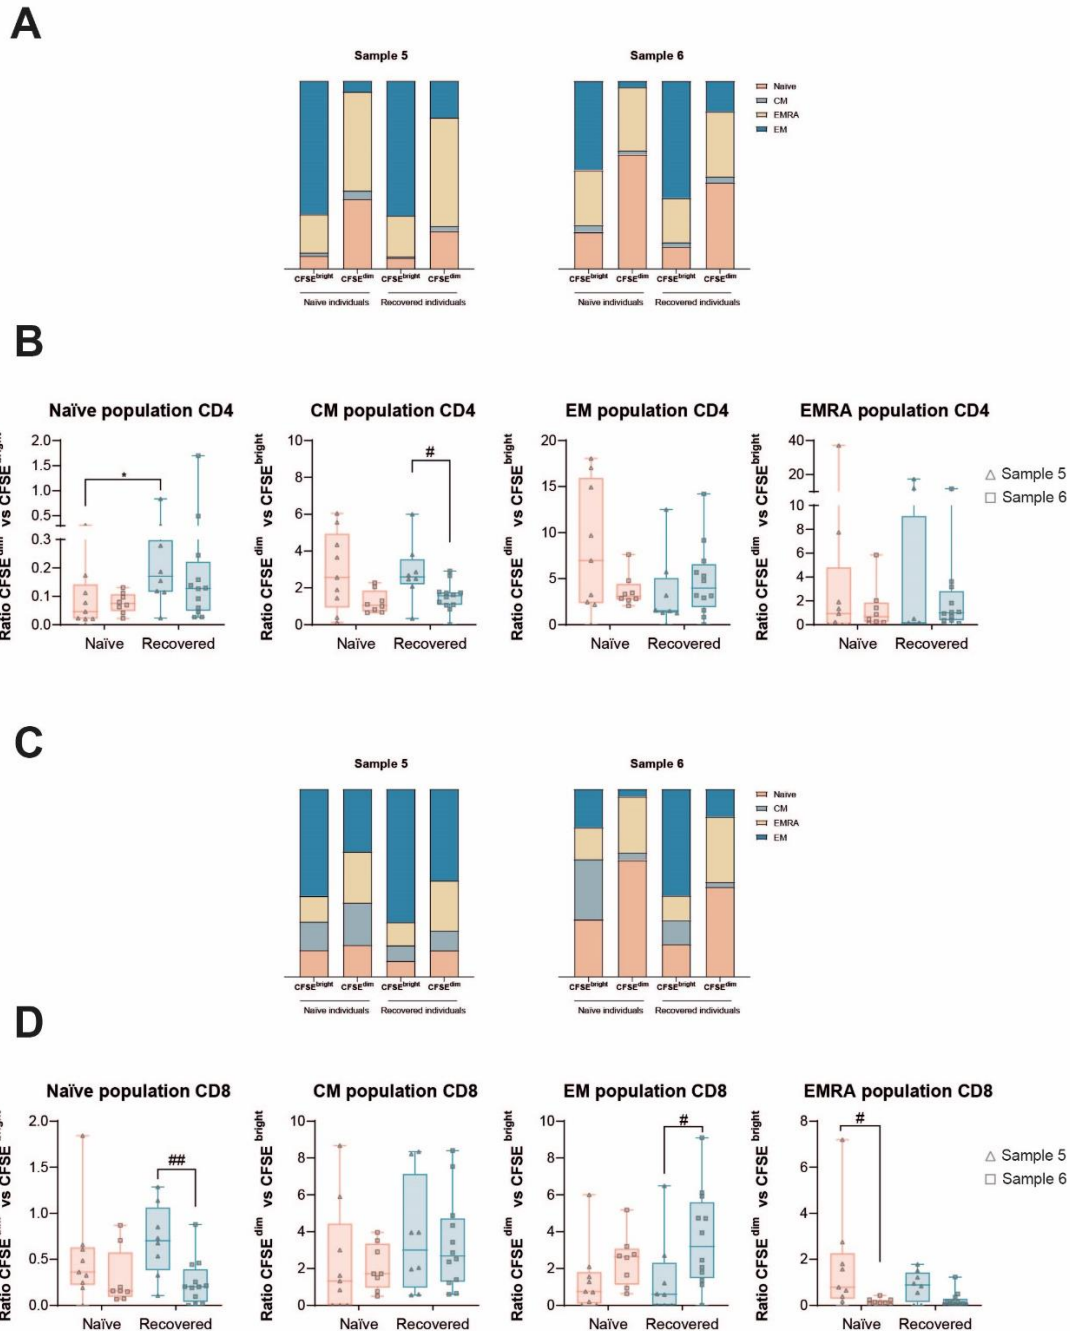

**Supplementary Figure 3. Memory subpopulations in SARS-CoV-2 spike-specific CD4<sup>+</sup> and CD8<sup>+</sup> T cells in naive subjects and individuals recovered from COVID-19.** Memory subpopulations (naïve; CM, central memory; EMRA, effector memory cells re-expressing CD45RA; EM, effector memory) were analyzed in T cells. **(A)** Frequency of memory populations in proliferative (CFSE<sup>dim</sup>) and non-proliferative (CFSE<sup>bright</sup>) CD4<sup>+</sup> T cells. **(B)** Proliferative (CFSE<sup>dim</sup>) versus non-proliferative (CFSE<sup>bright</sup>) ratio of CD4<sup>+</sup> T cell memory populations in samples 5 ( $\Delta$ ) and 6 ( $\square$ ). **(C)** Frequency of memory populations in proliferative (CFSE<sup>dim</sup>) and non-proliferative (CFSE<sup>bright</sup>) CD8<sup>+</sup> T cells. **(D)** Proliferative (CFSE<sup>dim</sup>) versus non-proliferative (CFSE<sup>bright</sup>) ratio of CD8<sup>+</sup> T cell memory populations in samples 5 ( $\Delta$ ) and 6 ( $\square$ ).

**A**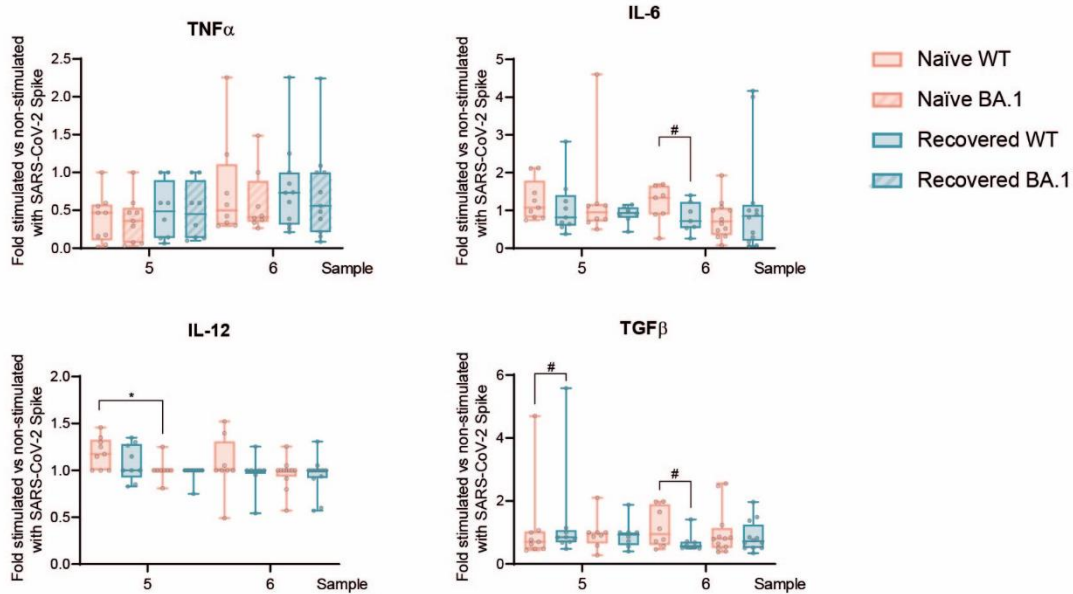**B**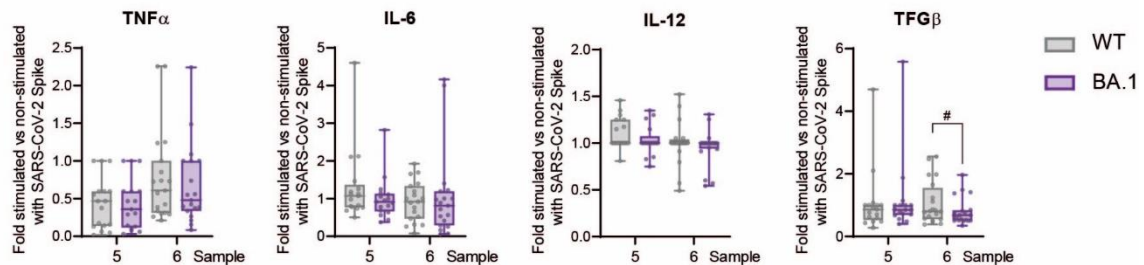

**Supplementary Figure 4. T cell *ex vivo* responses against SARS-CoV-2 Spike wild type and Omicron BA.1 following prime-boost vaccination in naïve and individuals recovered from COVID-19.** Following the scheme shown in figure 2A, responses to the third vaccination dose, both early and late, were studied in response to either SARS-CoV-2 wild type (WT) or Omicron BA.1 variant Spike peptide pool. **(A)** TNF $\alpha$ , IL-6, IL-12 and TGF $\beta$  production in naïve participants and recovered from COVID-19 at the indicated sample numbers and Spike variant. **(B)** TNF $\alpha$ , IL-6, IL-12 and TGF $\beta$  production in pooled participants at the indicated sample number. A, paired Student's t-test or Mann Whitney test according to normality, comparing samples 5 and 6 in naïve and subjects recovered from COVID-19 (\* $p < 0.05$ ), or WT vs BA.1 inside each group of participants (# $p < 0.05$ ). B, paired Student's t-test or Wilcoxon test according to normality, comparing WT vs BA.1 inside each participant group (# $p < 0.05$ ). Cytokines not induced in sample 5 are shown.

**A**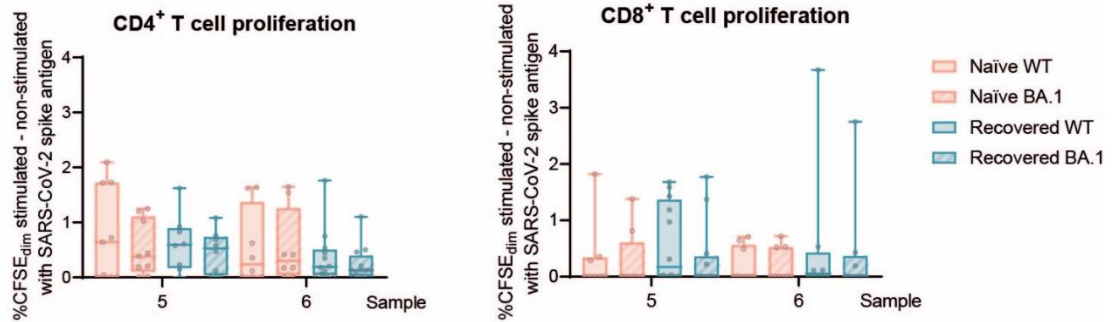**B**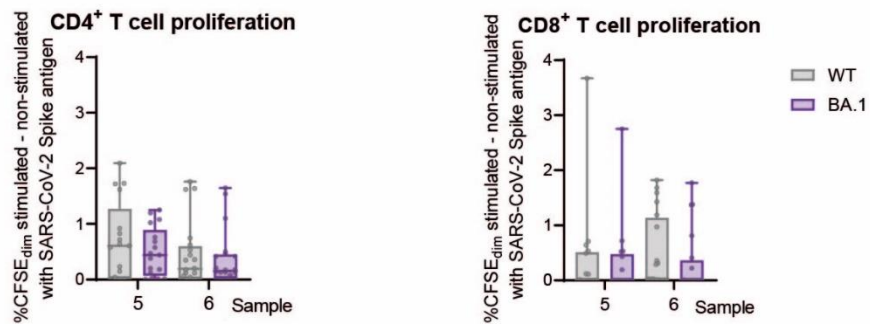

**Supplementary Figure 5. T cell proliferation against SARS-CoV-2 Spike wild type and Omicron BA.1 following prime-boost vaccination.** Following the scheme shown in figure 2A, T cell proliferation was analyzed as follows the increment of proliferation (CFSE<sup>dim</sup>) comparing SARS-CoV-2 Spike peptide pool-stimulated and non-stimulated CD4<sup>+</sup> (left panel) and CD8<sup>+</sup> (right panel) T cells in naïve participants and recovered from COVID-19 (**A**), or pooled (**B**) at the indicated sample numbers.

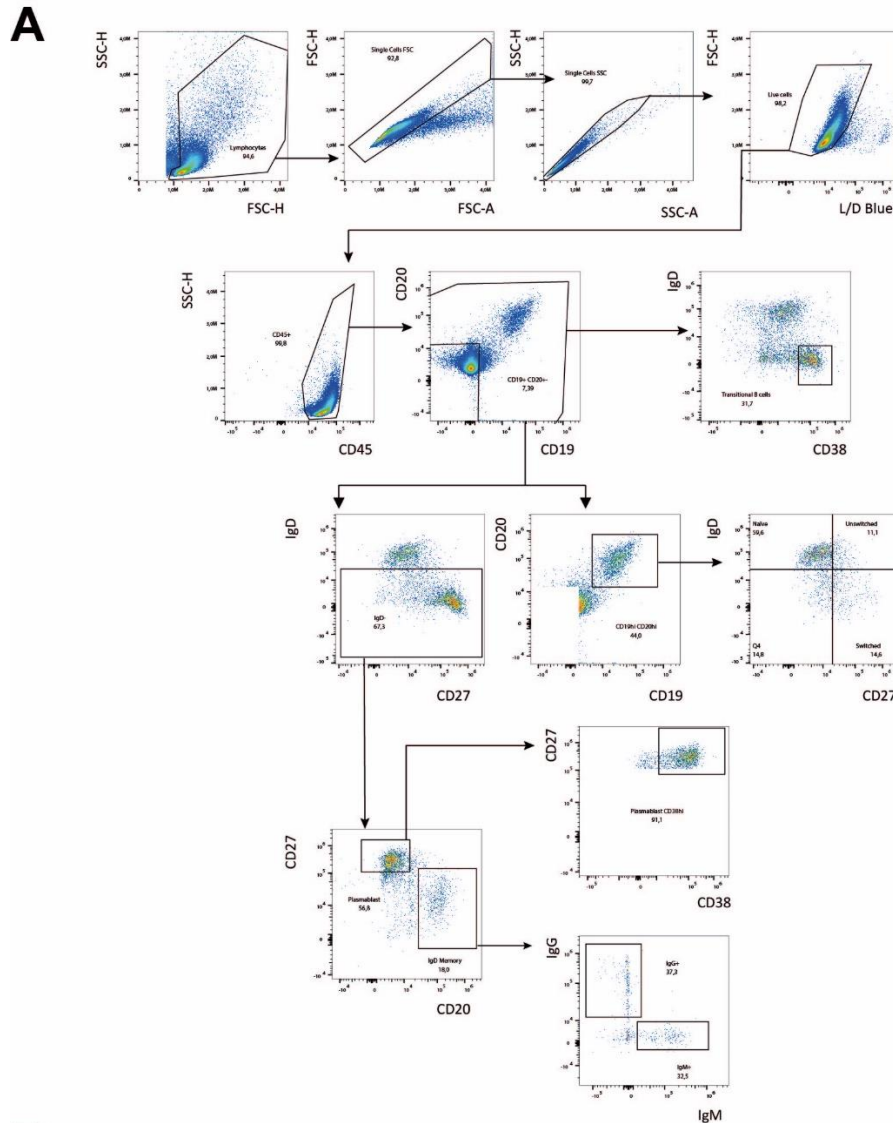

**Supplementary Figure 6. Analysis of B cell *ex vivo* responses against SARS-CoV-2 Spike wild type and Omicron BA.1 following prime-boost vaccination.** (A) FACS template used to analyze SARS-CoV-2 Spike-specific cellular responses in antibodies secreting cells. IL-6, IL-12, IL-8 and TGF- $\beta$ 1 production in pooled participants following stimulation with plated BSA, or SARS-CoV-2 Spike protein, either WT or Omicron BA.1. B, paired Student's t-test or Wilcoxon test according to normality, comparing stimuli (\*\* $p < 0.01$ ). Cytokines not induced over BSA control are shown.

## Supplementary Tables

**Supplementary Table 1. List of fluorochrome-conjugated monoclonal antibodies used for T cell proliferation assays by FACS.**

| <b>Marker</b> | <b>Fluorochrome</b> | <b>Source</b>     | <b>Clone</b> | <b>Reference</b> |
|---------------|---------------------|-------------------|--------------|------------------|
| CD3           | BV510               | Biologend         | OKT3         | Cat# 317332      |
| CD4           | cFluor-YG584        | Cytek Biosciences | SK3          | Cat# R7-20042    |
| CD8           | BUV805              | BD                | SK1          | Cat# 612889      |
| CD45          | PerCP               | Biologend         | 2D1          | Cat# 368506      |
| CD45RA        | BUV395              | BD                | 5H9          | Cat# 740315      |
| CD62L         | BV615               | BD                | SK11         | Cat# 751364      |
| CD28          | BV650               | Biologend         | CD28.2       | Cat# 302946      |
| CCR7          | BV421               | Biologend         | G043H7       | Cat# 353208      |

**Supplementary Table 2. List of fluorochrome-conjugated monoclonal antibodies for Spike-specific memory B cell activation by FACS.**

| <b>Marker</b> | <b>Fluorochrome</b> | <b>Source</b> | <b>Clone</b> | <b>Reference</b> |
|---------------|---------------------|---------------|--------------|------------------|
| CD19          | Spark NIR 685       | Biologend     | HIB19        | Cat# 302270      |
| CD20          | Pacific Orange      | ThermoFisher  | HI47         | Cat# MHCD2030    |
| CD24          | PE/Dazzle 594       | Biologend     | ML5          | Cat# 311134      |
| CD25          | PE-AlexaFluor 700   | ThermoFisher  | CD25-3G10    | Cat# MHCD2524    |
| CD27          | APC                 | Biologend     | M-T271       | Cat# 356410      |
| CD38          | APC-Fire 810        | Biologend     | HIT2         | Cat# 303550      |
| CD45          | PerCP               | Biologend     | 2D1          | Cat# 368506      |
| IgD           | BV480               | BD            | IA6-2        | Cat# 566138      |
| IgM           | BV570               | Biologend     | MHM-88       | Cat# 314517      |
| IgG           | BV605               | BD            | G18-145      | Cat# 563246      |
